# Supplementary material for: Structure Shapes Dynamics and Directionality in Diverse Brain Networks: Mathematical Principles and Empirical Confirmation in Three Species
Source: PubMed Central journal article supplement (PMC5397857; doi:10.1038/srep46606), 2017-04-20
Supplement: srep46606-s1.pdf [file srep46606-s1.pdf]

1 Structure Shapes Dynamics and Directionality  
2 in Diverse Brain Networks:  
3 Mathematical Principles and Empirical  
4 Confirmation in Three Species

5 **Supplementary Text**

6 Joon-Young Moon<sup>1</sup>, Junhyeok Kim<sup>2</sup>, Tae-Wook Ko<sup>3</sup>,  
7 Minkyung Kim<sup>2</sup>, Yasser Iturria Media<sup>4</sup>, Jee-Hyun Choi<sup>5</sup>,  
8 Joseph Lee<sup>1</sup>, George A. Mashour<sup>1</sup>, and UnCheol Lee<sup>1</sup>

9 <sup>1</sup>Center for Consciousness Science and Department of  
10 Anesthesiology, University of Michigan Medical School, USA

11 <sup>2</sup>Department of Physics, Pohang University of Science and  
12 Technology, Pohang, Republic of Korea

13 <sup>3</sup>National Institute for Mathematical Sciences, Daejeon,  
14 Republic of Korea

15 <sup>4</sup>Montreal Neurological Institute, McGill University, Canada

16 <sup>5</sup>Korea Institute of Science and Technology, Seoul, Republic of  
17 Korea

18 **Contents**

19 **1 Derivation of phases for the Kuramoto model in complex**  
20 **networks** **2**

21 Kuramoto model as a general model for a system of coupled oscil-  
22 lators in networks . . . . . 2

23 Mean-field approximation method applied to the model . . . . . 4

24 Local order parameter method applied to the model . . . . . 7

25 Relationship between directed Phase Lag Index and phase . . . . . 11

26 **2 Experimental analysis** **12**

27 Construction of the mouse structural network . . . . . 12

28 **3 Supplementary Figures Information** **14**

29 Here we provide details regarding the analysis summarized in the main  
30 manuscript. In section 1, we derive the results of the mathematical anal-  
31 ysis performed for the coupled oscillator model on complex networks. We  
32 begin with the description of the model we use - *the Kuramoto model* - and  
33 state that the model is the lowest-order approximation of the more detailed  
34 neural mass models and thus can be used to gain insights into how more real-  
35 istic models behave. We then proceed to the main results: the derivations of  
36 the phase of each oscillator in the networks by *mean-field approximation* and  
37 *local order parameter* methods. We also provide an argument for the idea  
38 that knowing the relative phase of each oscillator is qualitatively equivalent  
39 to knowing the *directed phase lag index (dPLI)* with high probability. In  
40 section 2, we provide more information about the experimental analysis for  
41 brain networks of different species. We begin with the process of constructing  
42 the structural brain network of mouse. Lastly, we give descriptions for the  
43 Supplementary Figures 1-7.

44

## 45 **1 Derivation of phases for the Kuramoto model** 46 **in complex networks**

47 In this section we describe in detail the mathematical analysis performed for  
48 the coupled oscillator model in complex networks. We first start with the  
49 statement of the model, then move on to derive the phases for each oscilla-  
50 tor with two methods. Lastly, we present an argument for the qualitative  
51 equivalence between relative phase and dPLI value for each oscillator.

### 52 **Kuramoto model as a general model for a system of** 53 **coupled oscillators in networks**

54 The first aim of this study is to refine the relationship of network topology  
55 and the dynamics of oscillators in the network in order to calculate precisely  
56 the phase of each oscillator in terms of network measures such as degree. We  
57 start by constructing a coupled oscillatory network model with the activity  
58 at each node of the network represented as a single phase variable:

$$\dot{\theta}_j(t) = \omega_j + S \sum_{k=1}^N A_{jk} H(\theta_k(t - \tau) - \theta_j(t)), \quad j = 1, 2, \dots, N, \quad (\text{S1})$$

59 where  $\dot{\theta}_j(t)$  is the phase of oscillator  $j$  at time  $t$ ,  $\omega_j$  is the natural frequency  
60 of the oscillator  $j$ ,  $N$  is the total number of oscillators,  $S$  is the overall cou-  
61 pling strength between oscillators,  $A_{jk}$  is the coupling between oscillator  $k$   
62 to oscillator  $j$ , and  $\tau$  is the finite transmission delay between different os-  
63 cillators emulating the delay of signal propagation between two neural mass  
64 populations.  $H()$  is the coupling function. Equation (S1) is a general form of  
65 coupled oscillators with time delays between them, giving the time evolution  
66 of the phase of oscillators. At a sufficient coupling strength  $S$ , coupled iden-  
67 tical oscillatory systems can be reduced to such a phase model in general [1].

68 Ref. [4] states that for a given coupled oscillatory system with time de-  
69 lays, if the delay between the coupled oscillators is smaller in the order of  
70 magnitude compared to the oscillator's oscillatory period, then there will  
71 be no explicit time delay: rather, the delay will appear as a simple phase  
72 difference term  $\beta$  in the coupling function.

73 Incorporating the result of ref. [4] and also using sine function as the  
74 coupling function,  $H() = \sin()$ , we arrive at the following so-called coupled  
75 Kuramoto-type oscillator model:

$$\dot{\theta}_j = \omega_j + S \sum_{k=1}^N A_{jk} \sin(\theta_k - \theta_j - \beta), \quad j = 1, 2, \dots, N. \quad (\text{S2})$$

76 The difference compared to the original Kuramoto model is that now the  
77 coupling among oscillators is selectively represented by  $A_{jk}$  [2, 3]. This  
78 Kuramoto-type oscillator model is the *canonical model* for oscillators, in the  
79 sense that it is the first-order approximation to the more general form of equa-  
80 tion(S1). In our text we will refer to our Kuramoto-type oscillator model as  
81 simply Kuramoto model for the brevity.

82 We note that, for the purpose of our analysis, the natural frequencies will  
83 be larger than zero and the nonzero phase delay  $\beta$  will be small compared  
84 to the given natural frequencies  $\omega_j$  to assume that  $\beta \in (0, \pi/2)$ . This will be  
85 the range of the parameters under our analysis.

86 We proceed to analytically predict the phases  $\theta_j$  from equation (S2).

87 **Mean-field approximation method applied to the model**

88 By utilizing the mean-field approximation (MFA) technique and self-consistency  
 89 argument described in our previous works [5, 6], we can simplify equation  
 90 (S2). Assuming that the oscillator connections are random, the following  
 91 approximation is applied [5, 7]:

$$S \sum_{k=1}^N A_{jk} H(\theta_k - \theta_j) \approx \frac{S n_j}{N} \sum_{k=1}^N H(\theta_k - \theta_j). \quad (\text{S3})$$

92 Here,  $n_j$  is the sum of coupling to the oscillator  $j$  defined as  $n_j = \sum_{k=1}^N A_{jk}$ .

93 With equation (S3), equation (S2) is approximately equivalent to the  
 94 following equation:

$$\dot{\theta}_j = \omega_j + \frac{S n_j}{N} \sum_{k=1}^N \sin(\theta_k - \theta_j - \beta), \quad j = 1, 2, \dots, N. \quad (\text{S4})$$

95 The aim of this subsection is to obtain the solution for  $\theta_j$  in equation  
 96 (S4). We first introduce *global order parameter*  $R$ :

$$R e^{i\Theta} = \frac{1}{N} \sum_{k=1}^N e^{i\theta_k}. \quad (\text{S5})$$

97  $R$  will have values between 0 and 1. 0 indicates uniform incoherence, and 1  
 98 indicates *in-phase synchrony*. In the state of in-phase synchrony, the oscilla-  
 99 tors of the system will oscillate with same frequency and same phase.

100 Let  $\Omega$  denote the frequency of the population oscillation of equation (S5)  
 101 after the system approaches a stationary state. Also let  $\phi_j = \theta_j - \Omega t$  rep-  
 102 resent the phase of oscillator  $j$  relative to the average phase of the system.  
 103 Equation (S4) can be rewritten using the order parameter as follows:

$$\dot{\phi}_j = \omega_j - \Omega + S n_j R \sin(\Phi - \phi_j - \beta), \quad j = 1, 2, \dots, N, \quad (\text{S6})$$

104 where  $\Phi = \Theta - \Omega t$ .

105 This system will exhibit a *partially locked state*, studied in our previous  
 106 work [5, 6]. For a non-zero coupling strength  $S$ , after a sufficient period of  
 107 time at which the system reaches a stable state, there will exist two groups of  
 108 oscillators with different behaviors. The oscillators in the *phase-locked group*  
 109 will have the same frequency, and thus their phase differences will remain

110 constant at any given time point. The oscillators in the *drifting group* will  
 111 not be able to *phase-lock* with the first group of oscillators and will have dif-  
 112 ferent frequencies. Thus, they will *drift* with different phase differences from  
 113 a given time point to a next time point. The condition for the oscillators to  
 114 be phase-locked is  $\dot{\phi}_j = 0$ . In order to satisfy this condition, the amplitude  
 115 of the coupling terms must be larger than the inherent terms:

$$Sn_jR > |\omega_j - \Omega|. \quad (\text{S7})$$

116 From the previous analysis of ref. [6], we know that for our set of param-  
 117 eters  $\omega > 0$  and  $\beta \in (0, \pi/2)$ ,  $\omega_j - \Omega$  will be larger than zero. This means  
 118 that the average frequency of the oscillators will be lower than the initially  
 119 given frequencies: the oscillators slow down as they synchronize with each  
 120 other. If we assume that the initial frequencies  $\omega_j$  for each node  $j$  are given  
 121 identically ( $\omega_j = \omega$  for  $j = 1, 2, \dots, N$ ), we can write the following expression  
 122 as the condition for the oscillator  $j$  to phase-lock:

$$n_j > \frac{\omega - \Omega}{SR} \equiv n_m. \quad (\text{S8})$$

123 The oscillators that phase-lock are the ones with their  $n_j > n_m$ ,

$$D_l = \left\{ j : n_m < n_j \right\}. \quad (\text{S9})$$

124 The oscillators that drift are the ones with their  $n_j < n_m$ ,

$$D_d = \left\{ j : n_j < n_m \right\}. \quad (\text{S10})$$

125

126

127 The oscillators satisfying the condition (S9) will asymptotically approach  
 128 a stable solution  $\phi_j^*$  obtained from the following equation:

$$\omega - \Omega = Sn_jR \sin(\phi_j^* - \Phi + \beta). \quad (\text{S11})$$

129 We can rearrange this equation to the following form:

$$\phi_j^* = \sin^{-1}\left(\frac{\Delta}{Sn_jR}\right) + \Phi - \beta, \quad (\text{S12})$$

130 where  $\Delta = \omega - \Omega$ .

131 Oscillators with the condition (S10) cannot satisfy the condition  $\dot{\phi}_j = 0$ .  
 132 They will drift monotonically without locking. We can describe their behav-  
 133 ior by invariant probability density  $\rho(\phi, n)$  in the stationary state. In the  
 134 stationary state the invariant probability density shall satisfy the condition  
 135  $\rho(\phi, n)v = \text{constant}$ , where  $v$  is the instantaneous frequency  $\dot{\phi}$ .

136 From this condition, we obtain the following probability density:

$$\rho(\phi, n) = \frac{C}{\Delta + SnR \sin(\Phi - \phi - \beta)}, \quad (\text{S13})$$

137 where the normalization constant  $C$  can be calculated from  $\int_0^{2\pi} \rho(\phi) d\phi = 1$  :

$$C = \frac{1}{2\pi} \sqrt{\Delta^2 - (SnR)^2}. \quad (\text{S14})$$

138 Equation (S12) gives the phase value for the phase-locked oscillators.  
 139 Equation (S13) and (S14) give the phase distribution for the drifting oscilla-  
 140 tors. Both of the equations can be solved given  $R$  and  $\Delta$ .  $R$  and  $\Delta$  can be  
 141 obtained in a similar way as described in ref. [5].

142 In the rotating frame of oscillator populations with the frequency  $\Omega$ , the  
 143 order parameter contribution from the locked subpopulation can be written  
 144 as the following:

$$\begin{aligned} & \int_{\mathcal{D}_l} dn g(n) e^{i\phi^*(n)} \\ &= e^{-i\beta} e^{i\Phi} \int_{\mathcal{D}_l} dn g(n) \\ & \times \frac{\sqrt{(SnR)^2 - \Delta^2} + \Delta}{SnR}, \end{aligned} \quad (\text{S15})$$

145 where  $\mathcal{D}_l$  is the domain with  $SnRN > |\Delta|$  and  $g(n)$  is the distribution for  $n$ .

146 The order parameter contribution from the drifting subpopulation can be  
 147 calculated by using population density  $\rho(\phi, n)$  of Eq. (S13).

$$\begin{aligned}
& \int_{D_d} \int_0^{2\pi} d\phi dn g(n) \rho(\phi, n) e^{i\phi} \\
&= i e^{-i\beta} e^{i\Phi} \int_{D_d} dn \frac{g(n)}{SnR} \left[ \Delta \right. \\
&\quad \left. - \operatorname{sgn}(\Delta) \sqrt{\Delta^2 - (SnR)^2} \right],
\end{aligned} \tag{S16}$$

148 where  $\int_0^{2\pi} d\phi \rho(\phi, n) e^{i\phi}$  is calculated using contour integration, and  $\operatorname{sgn}(x)$  is  
149 the sign function.  $\operatorname{sgn}(\Delta)$  appears for it determines which pole is inside the  
150 contour.  $D_d$  is the domain with  $SnRN < |\Delta|$ .

151 The sum of the contributions from the locked subpopulation (Eq. (S15))  
152 and from the drifting subpopulation (Eq. (S16)) together constitutes the  
153 order parameter  $Re^{i\Phi}$  in the rotating frame. For  $R$  and  $\Phi$  independent of  $n$ ,  
154 we obtain the following relation:

$$\begin{aligned}
R^2 &= i e^{-i\beta} \left[ \int_{D_{tot}} \frac{g(n)}{Sn} \Delta dn \right. \\
&\quad \left. - i \int_{D_l} \frac{g(n)}{Sn} \sqrt{(SnR)^2 - \Delta^2} dn \right. \\
&\quad \left. - \int_{D_d} \frac{g(n) \operatorname{sgn}(\Delta)}{Sn} \sqrt{\Delta^2 - (SnR)^2} dn \right],
\end{aligned} \tag{S17}$$

155 where  $D_{tot}$  is the total range of  $n$ . This gives two independent equations for  
156  $R$  and  $\Delta$ , which can be solved numerically.

## 157 **Local order parameter method applied to the model**

158 In this section we introduce *local order parameter method* to calculate the  
159 phase for equation (S2). A similar method has been used for other sys-  
160 tems [8], and/or other models [9].

161 We begin by introducing *local order paramter*  $r$ :

$$r_j e^{i\Theta_j} = \frac{1}{n_j} \sum_{k=1}^N A_{jk} e^{i\theta_k}. \tag{S18}$$



162 where  $n_j$  is again the sum of coupling to the oscillator  $j$  defined as  $n_j =$   
 163  $\sum_{k=1}^N A_{jk}$ . Local order parameter  $r_j$  of the oscillator  $j$  is a measure of syn-  
 164 chrony among the oscillators connected to the oscillator  $j$ . The value will  
 165 be 1 if they are in perfect synchrony and 0 if they are incoherent. Using the  
 166 local order parameter  $r_j$ , we can rewrite equation (S2) to the following form:

$$\dot{\theta}_j = \omega_j + Sn_j r_j \sin(\Theta_j - \theta_j - \beta), \quad j = 1, 2, \dots, N. \quad (\text{S19})$$

167 Unlike equation (S4) and (S6) using MFA, this equation (S19) is an exact  
 168 restatement of the original equation (S2). The aim of this section is to solve  
 169 this equation (S19) for the phase of each oscillator  $j$ ,  $\theta_j$ .

170 We can use the change of variables utilizing  $\Omega$  (the frequency of the pop-  
 171 ulation oscillation of equation (S5) after the system approaches a stationary  
 172 state). By letting  $\phi_j = \theta_j - \Omega t$ , and  $\Phi_j = \Theta_j - \Omega t$ , equation (S19) can be  
 173 rewritten:

$$\dot{\phi}_j = \omega_j - \Omega + Sn_j r_j \sin(\Phi_j - \phi_j - \beta), \quad j = 1, 2, \dots, N. \quad (\text{S20})$$

174 Again, the condition for the oscillators to be phase-locked is  $\dot{\phi}_j = 0$ . The  
 175 amplitude of the coupling terms for the oscillators must be larger than the  
 176 inherent terms:

$$Sn_j r_j > |\omega_j - \Omega|. \quad (\text{S21})$$

177 For our set of parameters  $\omega > 0$  and  $\beta \in (0, \pi/2)$ ,  $\omega_j - \Omega$  will be larger  
 178 than zero [6]. If we assume that the initial frequencies  $\omega_j$  for each node  $j$   
 179 are given identically ( $\omega_j = \omega$  for  $j = 1, 2, \dots, N$ ), we can write the following  
 180 expression as the condition for the oscillator  $j$  to phase-lock:

$$n_j r_j > \frac{\omega - \Omega}{S} \equiv n_l. \quad (\text{S22})$$

181 The oscillators that phase-lock are the ones with their  $n_j > n_l$ ,

$$D_l = \left\{ j : n_l < n_j r_j \right\}. \quad (\text{S23})$$

182 The oscillators that drift are the ones with their  $n_j < n_l$ ,

$$D_d = \left\{ j : n_j r_j < n_l \right\}. \quad (\text{S24})$$

183

184

185 Unlike the condition for the case of the MFA, now the condition involves  
 186 the local order parameter  $r_j$ . It is no longer the case that the degree (or  
 187 the weighted degree in the case of the weighted network) of the oscillator  
 188  $j$ ,  $n_j$  solely determines the dynamics of the oscillator  $j$ . Now the connected  
 189 oscillators play a role via  $r_j$ . Therefore, even though an oscillator has a degree  
 190 less than  $n_m$  (the threshold for the MFA), it is now possible to phase-lock if  
 191 the oscillator has a large value of  $r_j$ .

192 From equation (S20), we can derive the exact expression for the phase of  
 193 oscillator  $j$ . The oscillators satisfying the condition (S23) will asymptotically  
 194 approach a stable solution  $\phi_j^*$  obtained from the following equation:

$$\omega - \Omega = Sn_j r_j \sin(\phi_j^* - \Phi_j + \beta). \quad (\text{S25})$$

195 Rearranging this equation, we arrive at the following form:

$$\phi_j^* = \sin^{-1} \left( \frac{\Delta}{Sn_j r_j} \right) + \Phi_j - \beta, \quad (\text{S26})$$

196 where  $\Delta = \omega - \Omega$ .

197 The oscillators with the condition (S24) cannot satisfy the condition  $\dot{\phi}_j =$   
 198 0 and drift monotonically without locking. Their behavior is described by  
 199 the invariant probability density  $\rho$  and the condition  $\rho v = \text{constant}$  which  
 200 should be satisfied in the stationary state.  $v$  is the instantaneous frequency  
 201  $\dot{\phi}$ .

202 The probability density is obtained from the following condition:

$$\rho(\phi) = \frac{C}{\Delta + Sn_j r_j \sin(\Phi_j - \phi - \beta)}, \quad (\text{S27})$$

203 and the normalization constant  $C$  can be calculated from  $\int_0^{2\pi} \rho(\phi) d\phi = 1$  :

$$C = \frac{1}{2\pi} \sqrt{\Delta^2 - (Sn_j r_j)^2}. \quad (\text{S28})$$

204 Equation (S26) gives the exact phase value for the phase-locked oscillators.  
 205 Equation (S27) and (S28) give the phase distribution for the drifting  
 206 oscillators. These equations can now be solved in a similar way to that  
 207 described in ref. [10, 11].

208 In the rotating frame of the oscillator populations with the frequency  $\Omega$ ,  
 209 the local order parameter contribution from a locked subpopulation is written  
 210 as the following:

$$\begin{aligned} & \frac{1}{n_j} \sum_{k \in D_l} A_{jk} e^{i\phi_k^*} \\ &= \frac{e^{-i\beta}}{n_j} \sum_{k \in D_l} A_{jk} e^{i\Phi_k} \times \frac{\sqrt{(Sn_k r_k)^2 - \Delta^2} + i\Delta}{Sn_k r_k}. \end{aligned} \quad (\text{S29})$$

211 The local order parameter contribution from the drifting subpopulation can  
 212 be calculated by using population density  $\rho(\phi)$  of Eq. (S27).

$$\begin{aligned} & \frac{1}{n_j} \sum_{k \in D_d} A_{jk} \int_0^{2\pi} d\phi \rho(\phi) e^{i\phi} \\ &= \frac{ie^{-i\beta}}{n_j} \sum_{k \in D_d} A_{jk} \frac{e^{i\Phi_k}}{Sn_k r_k} \times \left[ \Delta - \sqrt{\Delta^2 - (Sn_k r_k)^2} \right] \end{aligned} \quad (\text{S30})$$

213 where  $\int_0^{2\pi} d\phi \rho(\phi) e^{i\phi}$  is calculated using contour integration.

214 The sum of the contributions from the locked subpopulation (Eq. (S29))  
 215 and from the drifting subpopulation (Eq. (S30)) constitutes the local order  
 216 parameter  $r_j e^{i\Phi_j}$  in the rotating frame. For  $r_j$ ,  $\Phi_j$  and  $\Delta$ , we obtain the  
 217 following relation:

$$\begin{aligned} r_j e^{i\Phi_j} = & \frac{ie^{-i\beta}}{n_j} \left[ \sum_{k=1}^N A_{jk} \frac{e^{i\Phi_k} \Delta}{Sn_k r_k} - i \sum_{k \in D_l} A_{jk} \frac{e^{i\Phi_k} \sqrt{(Sn_k r_k)^2 - \Delta^2}}{Sn_k r_k} \right. \\ & \left. - \sum_{k \in D_d} A_{jk} \frac{e^{i\Phi_k} \sqrt{\Delta^2 - (Sn_k r_k)^2}}{Sn_k r_k} \right]. \end{aligned} \quad (\text{S31})$$

218 This equation can be solved numerically, giving values to the unknowns  $r_j$ ,  
 219  $\Phi_j$  and  $\Delta$  [10, 11].

220 **Relationship between directed Phase Lag Index and phase**

221 We used directed phase lag index (dPLI) as the measure of *directionality*  
 222 between oscillators [12]. This measure reflects which of the two signals is  
 223 leading and which is lagging in phase. dPLI is defined as:

$$dPLI_{jk} = \langle \text{sign}\{\Delta\theta_{jk}(t)\} \rangle_t, \quad (\text{S32})$$

224 Here,  $\text{sign}\{\}$  function is defined to give either 1 if the argument of the func-  
 225 tion is positive, -1 if the argument is negative, and 0 if the argument is  
 226 0.  $\Delta\theta_{ij}(t)$  is the instantaneous phase difference between two nodes  $i$  and  $j$ :  
 227  $\Delta\theta_{ij}(t) = \theta_i(t) - \theta_j(t)$ . Thus  $\text{sign}\{\}$  function will yield 1 if  $\Delta\theta_{ij}(t) > 0$ , -1  
 228 if  $\Delta\theta_{ij}(t) < 0$ , and 0 if  $\Delta\theta_{ij}(t) = 0$ . The mean  $\langle \rangle_t$  is taken over all  $t=1, 2, 3, \dots,$   
 229  $n$ . Therefore, if on average, node  $i$  leads node  $j$ ,  $0 < dPLI_{ij} < 1$ ; if node  $j$  leads  
 230 node  $i$ ,  $-1 < dPLI_{ij} < 0$ ; and if there is no phase-lead/phase-lag relationship  
 231 between nodes,  $dPLI_{ij} = 0$ .

232 Given two oscillators, if they are phase-locked with each other, their phase  
 233 difference can be written as the following:

$$|\Delta\theta_{jk}| = |\theta_j - \theta_k| = \text{constant}, \quad (\text{S33})$$

234 for any given time point  $t = 1, 2, \dots, T$ . Therefore, given two phase-locked  
 235 oscillators,

$$\begin{aligned} \text{if } \theta_j \text{ phase-leads } \theta_k, \text{ then } dPLI_{jk} &= 1, \\ \text{if } \theta_j \text{ phase-lags } \theta_k, \text{ then } dPLI_{jk} &= -1. \end{aligned} \quad (\text{S34})$$

236 For each node  $\theta_j$ ,  $dPLI_j$  is defined as the average of  $dPLI_{jk}$  for all other  
 237 nodes  $k$ :

$$dPLI_j = \frac{1}{N} \sum_{k=1}^N dPLI_{jk} = \frac{1}{N} \sum_{k=1}^N \langle \text{sign}\{\Delta\theta_{jk}(t)\} \rangle_t. \quad (\text{S35})$$

238 For each node  $j$ , the transformed phase  $\phi_j = \theta_j - \Omega t$  represents the phase  
 239 relative to the average oscillation:

$$\phi_j = \theta_j - \Omega t = \theta_j - \frac{1}{N} \sum_{k=1}^N \theta_k = \frac{1}{N} \sum_{k=1}^N \Delta\theta_{jk}. \quad (\text{S36})$$

240 For phase-locked oscillators, the phase differences between oscillators do not  
 241 change over time. Therefore, the time-averaged value of  $dPLI_{jk}$  will be equal  
 242 to the value of  $dPLI_{jk}$  at any given time point:

$$dPLI_j = \frac{1}{N} \sum_{k=1}^N \text{sign}\{\Delta\theta_{jk}\}. \quad (\text{S37})$$

243 For phase-locked oscillators, the difference between  $dPLI_j$  and  $\phi_j$  is reduced  
 244 to the  $\text{sign}\{\}$  function. We can think of  $dPLI_j$  as a counting function of how  
 245 often  $\phi_j$  phase-leads or phase-lags other oscillators, whereas  $\phi_j$  is a *weighted*  
 246 counting function taking into account how much they are leading or lagging.  
 247 Therefore, for most probability distributions of the phase differences  $\Delta\theta_{jk}$ ,  
 248 these two measures will yield qualitatively similar values for each oscillator  $j$ .  
 249 Only a very skewed probability distribution functions will yield qualitatively  
 250 different values.

251

## 252 **2 Experimental analysis**

253 In this section, we provide more information on the experimental analysis of  
 254 brain networks of different species. First we describe in depth the process of  
 255 constructing the structural brain network of mouse.

### 256 **Construction of the mouse structural network**

#### 257 *Image acquisition*

258 In vivo DTI of adult mouse brains ( $n = 8$ ) was performed using a modified 3D  
 259 diffusion- weighted gradient and spin echo (DW-GRASE) sequence [13] with  
 260 the following parameters: TE/TR = 33/500 ms, 2 signal averages, 20 imag-  
 261 ing echoes (4 spin echoes distributed along the phase encoding direction and  
 262 16 gradient echoes distributed along the slice selection direction) after each  
 263 excitation with twin navigator echoes in the end for motion and phase correc-  
 264 tions, 12 diffusion directions,  $b = 1000 \text{ s/mm}^2$ , field of view (FOV) = 16 mm  
 265  $\times$  16 mm  $\times$  17.6 mm, a matrix size of 128  $\times$  128  $\times$  140, and a native imaging  
 266 resolution = 0.125 mm  $\times$  0.125 mm  $\times$  0.125 mm. This dataset is available at  
 267 the Johns Hopkins Medical Institute, Laboratory of Brain Anatomical MRI,  
 268 and was downloaded from <http://cmrm.med.jhmi.edu> [15]. All experimental

269 procedures were approved by the Animal Use and Care Committee at the  
270 Johns Hopkins University School of Medicine.

271

### 272 *Image Processing*

273 The 3D images acquired using the DW-GRASE sequence were reconstructed  
274 from raw data in MATLAB ([www.mathworks.com](http://www.mathworks.com)) with navigator-based mo-  
275 tion and phase correction [14]. Using the log-linear fitting method imple-  
276 mented in DTIStudio (<http://www.mristudio.org>) [16], diffusion tensor was  
277 calculated at each pixel along with the apparent diffusion coefficient (ADC),  
278 fractional anisotropy (FA), primary eigenvector, axial diffusivity ( $\parallel$ , the pri-  
279 mary eigenvalue), and radial diffusivity ( $\perp$ , the average of the secondary and  
280 tertiary eigenvalues). The adult mouse brain images were rigidly aligned to  
281 ex vivo mouse brain images in our MRI based mouse brain atlas [17] using the  
282 landmark based rigid transformation implemented in the DiffeoMap software  
283 ([www.mristudio.org](http://www.mristudio.org)). In addition, we took the image volumes represent-  
284 ing the canonical Waxholm Space (WHS) mouse brain [18], which include  
285 T1-, T2\*-, and T2-Weighted MR volumes, Nissl-stained optical histology,  
286 and a label volume describing 37 structures (all volumes are represented at  
287 21.5 $\mu$ m isotropic resolution and are available at [http://software.incf.org/soft-  
288 ware/waxholm-space](http://software.incf.org/software/waxholm-space)). From the defined 37 structures we selected 24 gray  
289 matter regions. We separated left and right hemispheres, and because in this  
290 parcellation scheme the cerebral cortex is originally denoted as only one re-  
291 gion, we re-parcellated both hemispheric cerebral cortex into 50 small regions  
292 (i.e., 50 for each hemispheric cortex) of approximately the same volume [19].  
293 Finally, the parcellation procedure resulted in a modified WHS parcellation  
294 scheme of 74 cortical and subcortical gray matter regions for each hemisphere.

295

### 296 *Axonal connectivity estimation and Network Construction*

297 Axonal trajectories between each pair of gray matter regions (defined by the  
298 modified WHS parcellation scheme) were estimated using a fully automated  
299 fiber tractography [20]. Tracking parameters used were: 200 mm as maxi-  
300 mum trace length and 900 as curvature threshold over voxel. Next, a whole  
301 brain undirected weighted network was created as follows: 1) a node was de-  
302 fined to represent each considered anatomic region, 2) an undirected arc  $a_{ij}$   
303 between any nodes  $i$  and  $j$  was established with a corresponding arc weight  
304  $w(a_{ij})$ , defined as the effective number of connected voxels (weighing by the  
305 obtained probability of connection) relative to the number of voxels over the  
306 surface of regions  $i$  and  $j$ , where each fiber path was quantified according to

307 the arithmetic mean of the inverse of its mean diffusivity values. Finally, the  
308 connectivity backbone was estimated for the created brain network [19, 21].  
309 First, a maximum spanning tree, which connects all nodes of the network  
310 such that the sum of its weights is maximal, was extracted; then, additional  
311 edges were added in order of their weight until the average node degree was  
312 4. All posterior network analysis and visual representations were based on  
313 the resultant networks (connectivity backbones).

### 314 **3 Supplementary Figures Information**

#### 315 *Supplementary Figure 1*

316 In our work, the analytically calculated phases and dPLIs were directly com-  
317 pared with those of EEG data from humans, macaques, and mice. For the  
318 visualization, we first mapped the averaged node degree, phase and dPLI val-  
319 ues at each node to their positions in the brains, both for analytical predic-  
320 tions and experimental analysis. Then the mapped values were extrapolated  
321 to make the topographic figures in Figure 4 of the main manuscript for all  
322 subjects. The pre-extrapolated channel level data are shown in Supplemen-  
323 tary Figure 1, for both analytical prediction (left column) and experimental  
324 analysis (right column).

#### 325 *Supplementary Figure 2*

326 For macaque monkeys (three *M. fuscata*, and one *M. mulatta*), the data were  
327 freely acquired from Project Tycho (<http://neurotycho.org/>) from RIKEN [22].  
328 For each monkey, 128-channel electrocorticography (ECoG) of a single (left)  
329 hemisphere was recorded in the eyes-closed resting state. Since the four  
330 monkeys all have slightly different channel locations, we divided the left  
331 hemisphere of the cortex into 48 regions by using the parcellation scheme  
332 developed by Lewis and van Essen, and calculated the average value of chan-  
333 nels for each region [23]. The 48 regional values were then compared across  
334 monkeys. The parcellation scheme is shown in Supplementary Figure 2. The  
335 dotted lines in gray represent the borders between each region. As an exam-  
336 ple, the dPLI values at each channel for all monkeys are shown in the figure,  
337 before the averaging process.  
338

#### 339 *Supplementary Figure 3*

341 We compared the values from the analytic prediction from mean-field approx-

342 imation (MFA) method, local order parameter (LOP) method, and experi-  
343 mental analysis (EXP). We computed Spearman correlations for the degree,  
344 phase and dPLI values between each analysis. The results are shown in  
345 Supplementary Figure 3. Each element in the matrices represents the corre-  
346 lation values between each analysis. Note that the highest correlation value  
347 between different analysis was LOP and EXP for the dPLI of human left  
348 hemisphere (0.89). The lowest value was between LOP and EXP for the  
349 phase of macaque (0.28).

350

351 *Supplementary Figure 4-7*

352 The topography figures for the data of individual subjects from human left  
353 hemisphere and entire hemisphere (Supplementary Figure 4 and 5), macaque  
354 (Supplementary Figure 6) and mouse (Figure 7) are shown, before the av-  
355 eraging was performed (Figure 4 in the main manuscript shows the results  
356 after averaging across subjects). We note that a few individual subjects show  
357 opposite patterns such as the phase and dPLI of human subjects 2 and 4,  
358 and the degree of mouse subject 2. These deviations are expected, since the  
359 predictions are all done based on structural networks averaged over a large  
360 number of subjects for each species, and the experimental data are from  
361 different subjects altogether. Therefore our prediction would become more  
362 accurate when compared to empirical data averaged over a large number of  
363 subjects. Simultaneous recordings of both anatomical network and EEG for  
364 the same individual could also improve the predictability.

365

366 *Supplementary Figure 8*

367 We also performed our simulation with distance-dependent delays between  
368 each node of the brain network. The topography figures are shown for  
369 phases and dPLIs in Supplementary Figure 8 (a) and (b). We also com-  
370 pared the values from the analytic prediction from local order parameter  
371 (LOP) method, distance-dependent delays simulations (SIM), and experi-  
372 mental analysis (EXP). We computed Spearman correlations for the phase  
373 and dPLI values between each analysis. The results are shown in Supple-  
374 mentary Figure 8 (c) and (d). Each element in the matrices represents the  
375 correlation values between each analysis. Note that the correlation values  
376 between SIM and EXP are usually higher than the values between LOP and  
377 EXP.

378



## 379 Supporting References

- 380 [1] Hoppensteadt, F. C. & Izhikevich, E. M. *Weakly Connected Neural Net-*  
381 *works*. (Springer-Verlag, 1997).
- 382 [2] Kuramoto, Y. *International Symposium on Mathematical Problems in*  
383 *Theoretical Physics, Lecture Notes in Physics, 39*. (Arakai, H.), 420-422  
384 (Springer-Verlag, 1975).
- 385 [3] Strogatz, S. H. *Nonlinear Dynamics and Chaos. 1st ed.* (Westview Press,  
386 1994).
- 387 [4] Izhikevich, E. M. Phase models with explicit time delays. *Phys Rev E*.  
388 **58**, 905-908 (1998).
- 389 [5] Ko, T. W. & Ermentrout, G. B. Partially locked states in coupled oscil-  
390 lators due to inhomogeneous coupling. *Phys Rev E*. **78**, 016203 (2008).
- 391 [6] Moon, J.-Y., Lee, U., Blain-Moraes & S., Mashour, G. A. General rela-  
392 tionship of global topology, local dynamics, and directionality in large-  
393 scale brain networks. *PLoS Comput Biol*. **11**, e1004225 (2015).
- 394 [7] Hong, H., Park, H. & Tang, L.-H. Finite-size scaling of synchronized  
395 oscillation on complex networks. *Phys Rev E*. **76**, 066104 (2007).
- 396 [8] Shima, S. I. & Kuramoto, Y. Rotating spiral waves with phase-  
397 randomized core in nonlocally coupled oscillators. *Phys. Rev. E*. **69**,  
398 036213 (2004).
- 399 [9] Restrepo, J. G., Ott, E. & Hunt, B. R. Onset of synchronization in large  
400 networks of coupled oscillators. *Phys. Rev. E*. **71**, 036152 (2004).
- 401 [10] Kuramoto, Y. & Battogtokh, D. Coexistence of coherence and incoher-  
402 ence in nonlocally coupled phase oscillators. *Nonlin. Phenom. Compl.*  
403 *Syst.* **5**, 380-385 (2002).
- 404 [11] Abrams, D. M. & Strogatz, S. H. Chimera states in a ring of nonlocally  
405 coupled oscillators. *Int. J. Bifurc. Chaos*. **16**, 21-37 (2006).
- 406 [12] Stam, C. J. & van Straaten, E.C. W. Go with the flow: use of a directed  
407 phase lag index (dPLI) to characterize patterns of phase relations in a  
408 large-scale model of brain dynamics. *NeuroImage*. **62**, 1415-1428 (2012).

- 409 [13] Aggarwal, M., Mori, S., Shimogori, T., Blackshaw, S. & Zhang J. Three-  
410 dimensional diffusion tensor microimaging for anatomical characteriza-  
411 tion of the mouse brain. *Magn Reson Med.* **64**, 249–261 (2010).
- 412 [14] Mori, S. & van Zijl, P. C. A motion correction scheme by twin-echo nav-  
413 igation for diffusion-weighted magnetic resonance imaging with multiple  
414 RF echo acquisition. *Magn Reson Med.* **40**, 511-516 (1998).
- 415 [15] Wu, D., Xu, J., McMahon, M. T., van Zijl, P. C., Mori, S., Northington,  
416 F. J. & Zhang, J. In vivo high-resolution diffusion tensor imaging of the  
417 mouse brain. *Neuroimage.* **83**, 18-26 (2013).
- 418 [16] Jiang, H., van Zijl, P. C., Kim, J., Pearlson, G. D. & Mori, S. DtiStu-  
419 dio: resource program for diffusion tensor computation and fiber bundle  
420 tracking. *Comput Methods Programs Biomed.* **81**, 106–116 (2006).
- 421 [17] Chuang, N., Mori, S., Yamamoto, A., Jiang, H., Ye, X., Xu, X.,  
422 Richards, L. J., Nathans, J., Miller, M. I., Toga, A. W., Sidman, R.  
423 L. & Zhang, J. An MRI-based atlas and database of the developing  
424 mouse brain. *NeuroImage.* **54**, 80–89 (2011).
- 425 [18] Johnson, G., Badea, A., Brandenburg, J., Cofer, G., Fubara, B. *et al.*  
426 Waxholm space: an image-based reference for coordinating mouse brain  
427 research. *Neuroimage.* **53**, 365-72 (2010).
- 428 [19] Iturria-Medina, Y., Pérez Fernández, A., Valdés Hernández, P., García  
429 Pentón, L., Canales-Rodríguez, E. J., Melie-García, L., Lage Castel-  
430 lanos, A. & Ontivero Ortega, M. Automated discrimination of brain  
431 pathological state attending to complex structural brain network prop-  
432 erties: the shiverer mutant mouse case. *PLoS One.* **6**, e19071 (2011).
- 433 [20] Iturria-Medina, Y., Canales-Rodríguez, E. J., Melie-García, L., Valdés-  
434 Hernández, P. A., Martínez-Montes, E., Alemán-Gómez, Y. & Sánchez-  
435 Bornot, J. M. Characterizing brain anatomical connections using dif-  
436 fusion weighted MRI and graph theory. *Neuroimage.* **36**, 645-60 (2007).
- 437 [21] Hagmann, P., Cammoun, L., Gigandet, X., Meuli, R., Honey, C. J. *et*  
438 *al.* Mapping the structural core of human cerebral cortex. *Plos Biology.*  
439 **6**, 1479–1493 (2008).

- 440 [22] Yanagawa, T., Chao, Z. C., Hasegawa, N. & Fujii, N. Large-scale in-  
441 formation flow in conscious and unconscious states: an ECoG study in  
442 monkeys. *PLoS One*. **8**, e80845 (2013).
- 443 [23] Lewis, J. W. & Van Essen, D. C. Corticocortical connections of visual,  
444 sensorimotor, and multimodal processing areas in the parietal lobe of  
445 the macaque monkey. *J. Comp. Neurol.* **428**, 112–37 (2000).

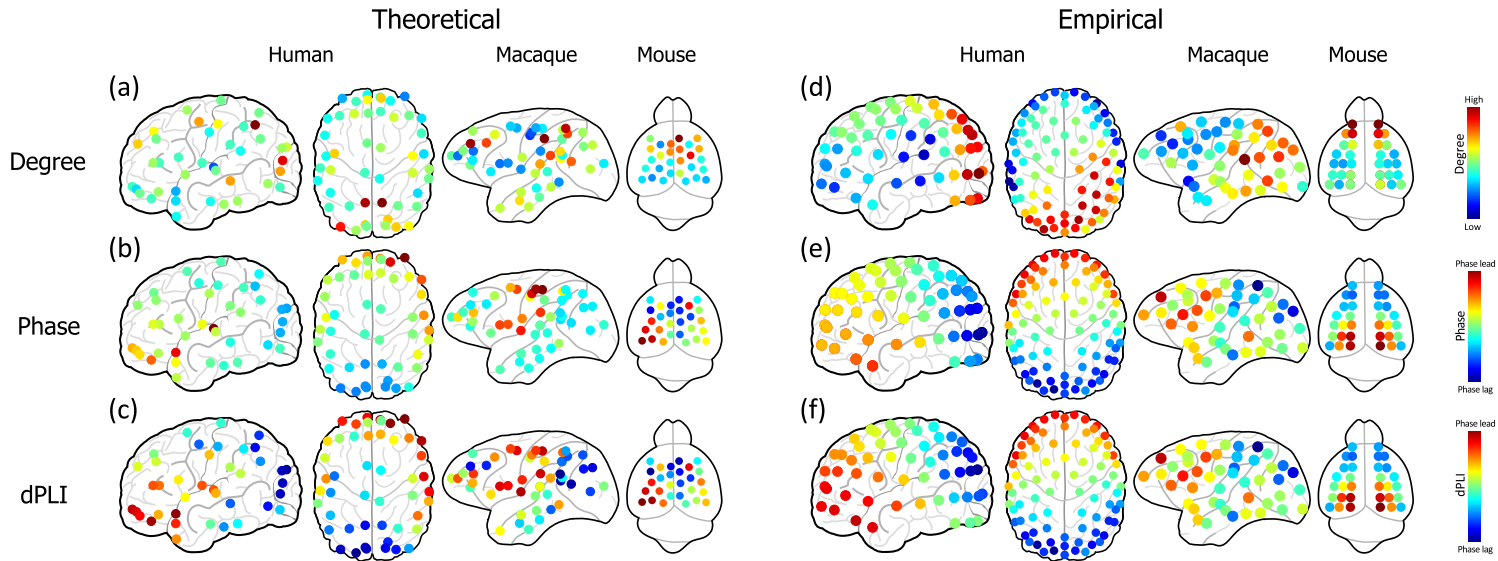

**Supplementary Figure 1: Channel plots of degree, phase, and directed Phase Lag Index (dPLI) for brain networks.** Channel plot figures from theoretical prediction (a)-(c), and empirical analysis (d)-(f) are shown for the brain networks of each species. Degree calculated from (a) structural network and (d) functional network from PLI analysis of EEG/ECoG for different species are shown. Phase predicted from (b) theory and (e) experiments of different species are shown. dPLI predicted from (c) theory, and (f) experiments for different species are shown.

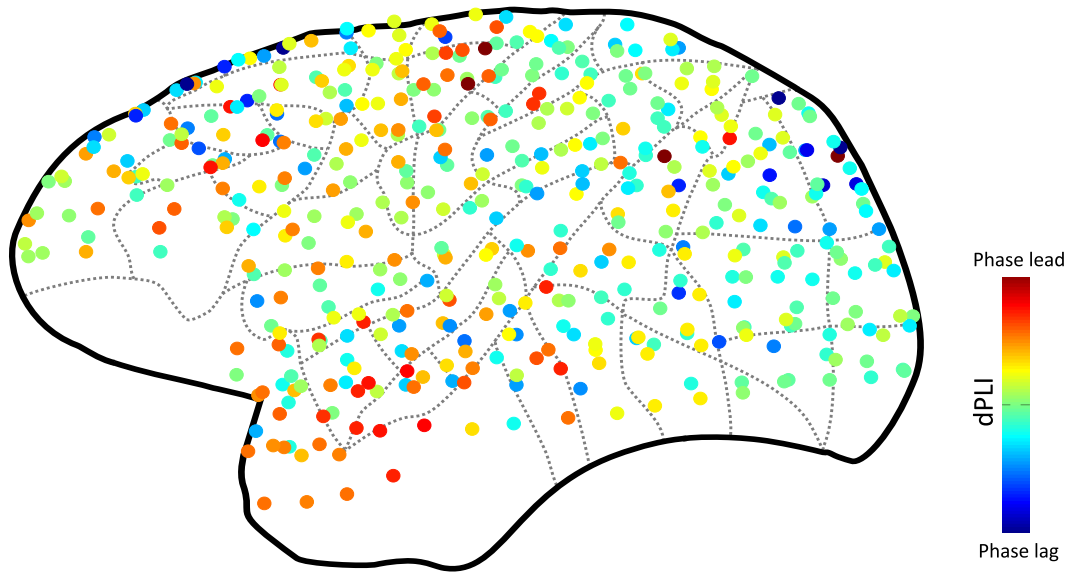

**Supplementary Figure 2: Parcellation of the macaque brain.** The parcellation scheme for the macaque brain by Lewis and Essen from ref. 18 is shown as gray dotted lines (---). The dPLI values for each channel for all 4 macaque subjects are shown here with the colors ranging from blue (small dPLI value) to red (large dPLI value). The channel locations are different from subject to subject.

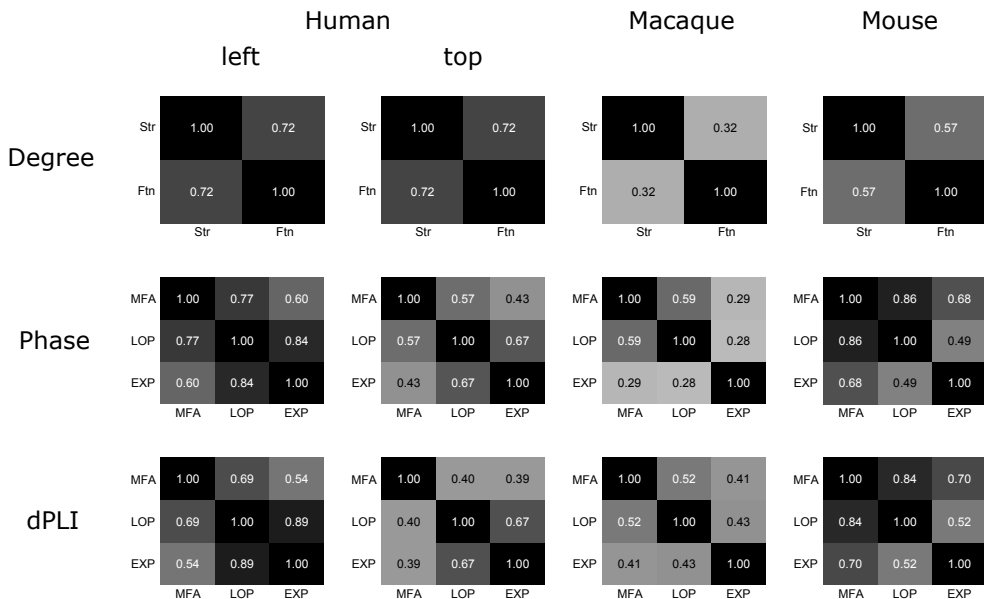

**Supplementary Figure 3: Spearman correlation values between analytical prediction and experimental data.** Each matrix elements shows the corresponding Spearman correlation between each dataset. The higher the value is for each element, the darker the color for the background of the element. The following abbreviations are used throughout: Str (structural), Ftn (functional), EXP (experimental), MFA (mean-field approximation), and LOP (local order parameter).

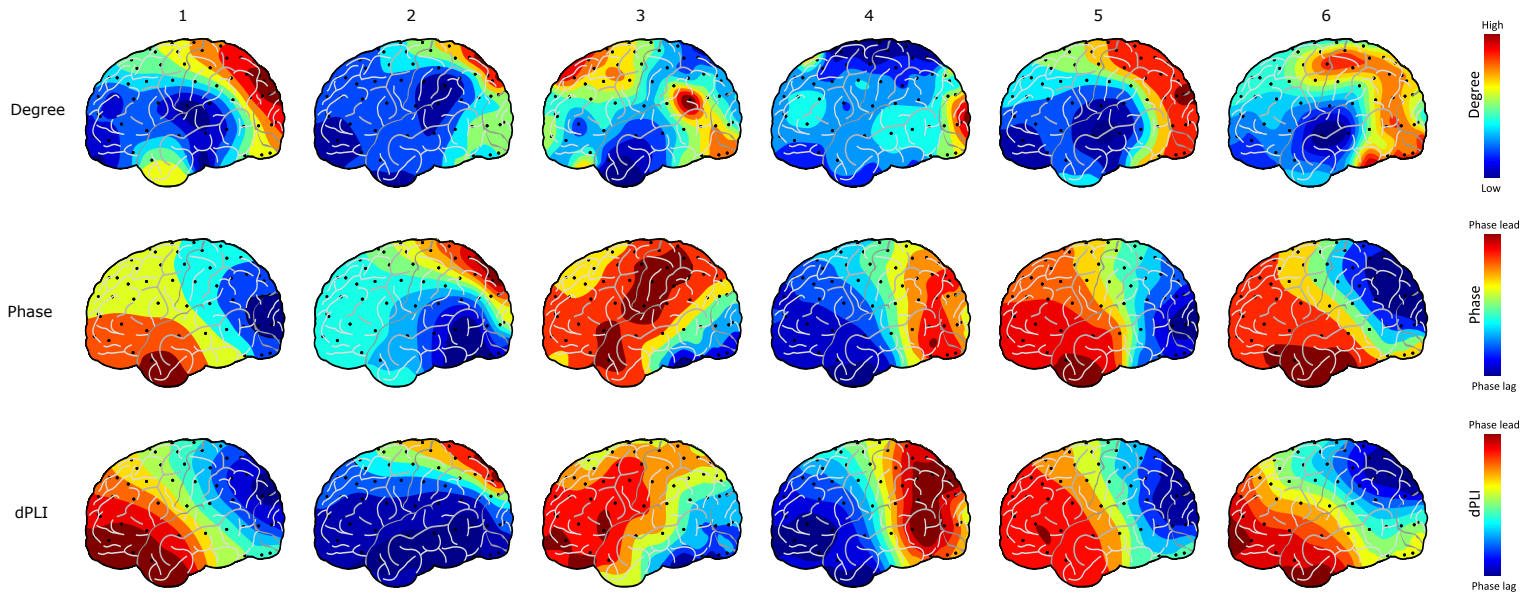

**Supplementary Figure 4: Topographic plots of degree, phase, and dPLI for brain networks of individual human subjects – side view.** Topographic figures from empirical analysis of individual human subjects are shown, from left side view.

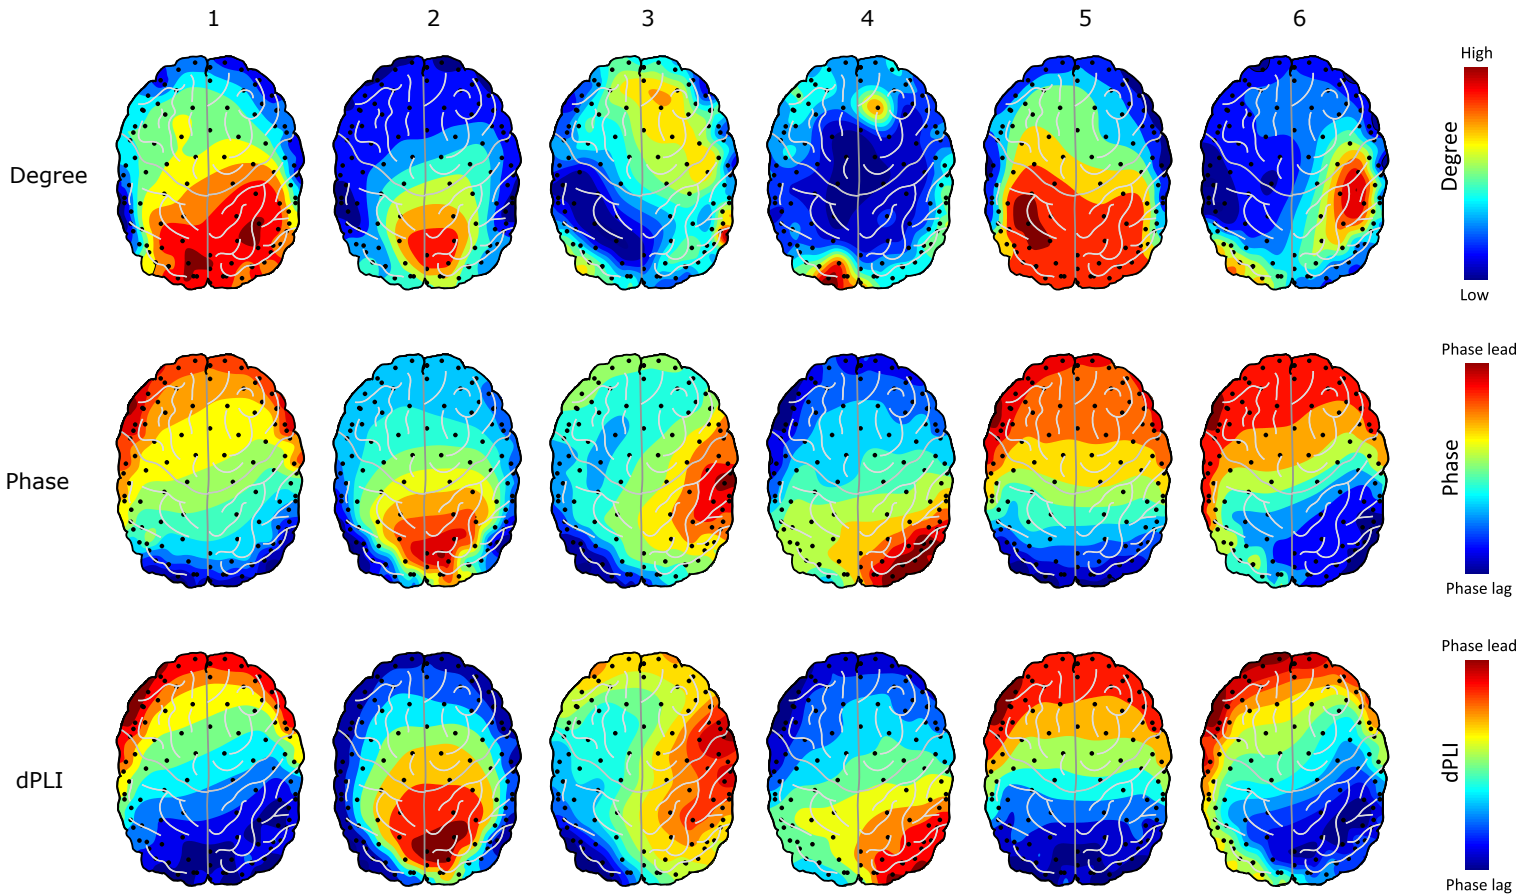

**Supplementary Figure 5: Topographic plots of degree, phase, and dPLI for brain networks of individual human subjects – top view.**  
 Topographic figures from empirical analysis of individual human subjects are shown, from top view.



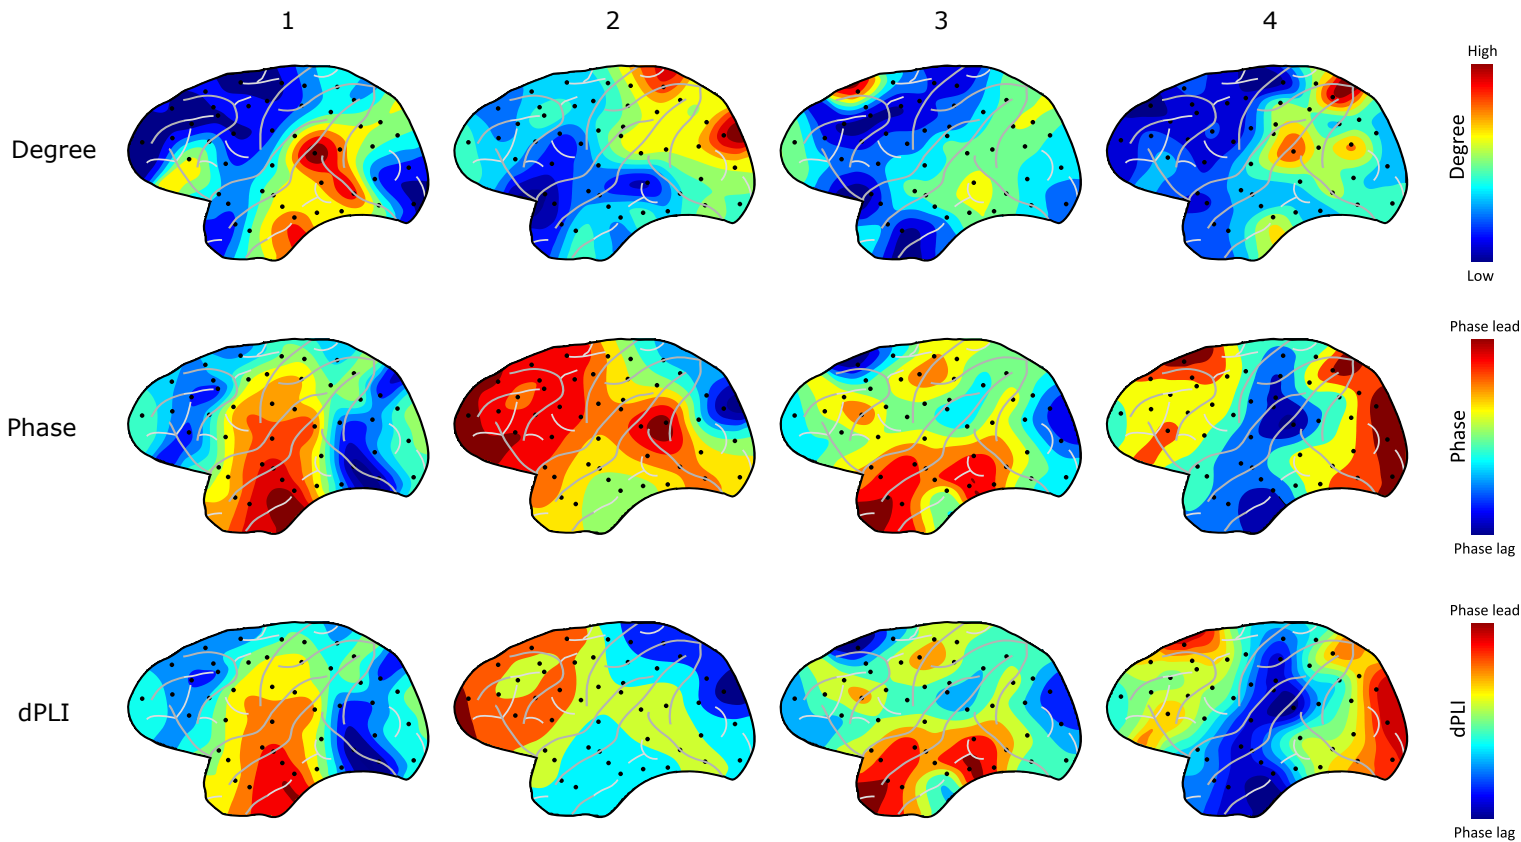

**Supplementary Figure 6: Topographic plots of degree, phase, and dPLI for brain networks of individual macaque.** Topographic figures from empirical analysis of individual macaque subjects are shown, from left side view.

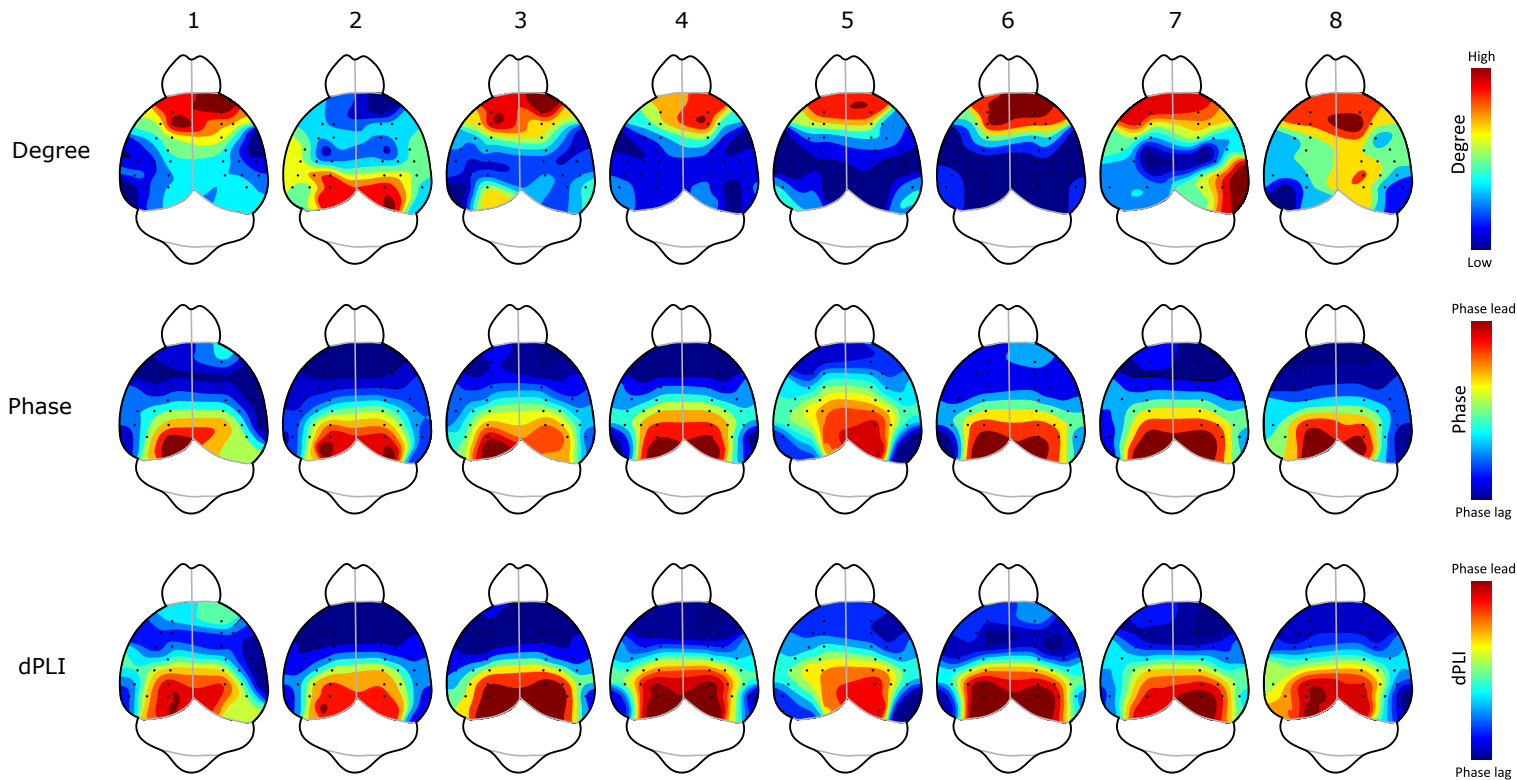

**Supplementary Figure 7: Topographic plots of degree, phase, and dPLI for brain networks of individual mouse.** Topographic figures from empirical analysis of individual mouse subjects are shown, from top view.

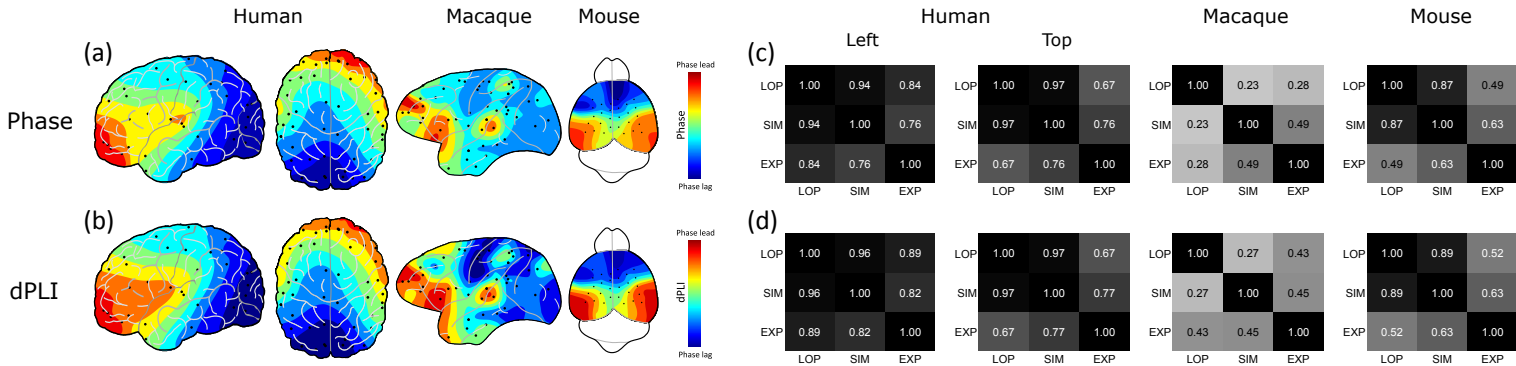

**Supplementary Figure 8: Topographic plots of phase and dPLI for the heterogeneous time delay simulations as well as Spearman correlation values between the simulations and experimental data.** (a) and (b) are the topographic plots for node phase and dPLI for the distance-dependent time delay simulations of human, macaque, and mouse. (c) and (d) are the Spearman correlation values between the analytic predictions using the local order parameter method (LOP), the distance-dependent time delay simulations (SIM) and the experimental data (EXP). Each matrix element shows the corresponding Spearman correlation between each dataset. The higher the value is for each element, the darker the color for the background of the element.
